# Supplementary material for: Pulmonary Vasodilator Therapy Is Associated with Decreased Mortality in Patients with Chronic Lung Disease and Severe Pulmonary Hypertension
Source: MDPI journal article supplement (doi:10.3390/jcdd11030089), 2024-03-08
Supplement: s1 [file s1]

**Table S1.** Prescribed Pulmonary Vasodilator Therapy.

| <b>Pulmonary Vasodilator Therapy</b>                | <b>Number of Patients Prescribed (n=123)</b> |
|-----------------------------------------------------|----------------------------------------------|
| PDE-5 inhibitor, n (%)                              | 101 (82.1)                                   |
| Endothelin Receptor Antagonist, n (%)               | 36 (29.3)                                    |
| Inhaled Prostacyclin, n (%)                         | 23 (18.7)                                    |
| Subcutaneous Prostacyclin, n (%)                    | 4 (3.3)                                      |
| Intravenous Prostacyclin, n (%)                     | 1 (0.8)                                      |
| Oral Soluble Guanylate Cyclase Stimulator,<br>n (%) | 5 (4.1)                                      |

85 patients were prescribed single pulmonary vasodilator therapy, 30 patients were prescribed dual pulmonary vasodilator therapy, and 8 patients were prescribed triple pulmonary vasodilator therapy.
